1 **Title**

2 Excretion of triacylglycerol as a matrix lipid facilitating apoplastic accumulation of a  
3 lipophilic metabolite shikonin.

4

5 **Authors**

6 Kanade Tatsumi<sup>1,8</sup>, Takuji Ichino<sup>1</sup>, Natsumi Isaka<sup>1</sup>, Akifumi Sugiyama<sup>1</sup>, Yozo  
7 Okazaki<sup>2</sup>, Yasuhiro Higashi<sup>2</sup>, Masataka Kajikawa<sup>3</sup>, Hideya Fukuzawa<sup>3</sup>, Kiminori  
8 Toyooka<sup>2</sup>, Mayuko Sato<sup>2</sup>, Ikuyo Ichi<sup>4</sup>, Koichiro Shimomura<sup>5</sup>, Hiroyuki Ohta<sup>6</sup>, Kazuki  
9 Saito<sup>2,7</sup>, and Kazufumi Yazaki<sup>1,9\*</sup>

10

11 **Affiliations**

12 <sup>1</sup> Research Institute for Sustainable Humanosphere, Kyoto University, Uji 611-0011,  
13 Japan

14 <sup>2</sup> RIKEN CSRS, Yokohama 230-0045, Japan

15 <sup>3</sup> Graduate School of Biostudies, Kyoto University, Kyoto 606-8502, Japan

16 <sup>4</sup> Graduate School of Humanities and Sciences, Ochanomizu University, Tokyo 112-  
17 8610, Japan

18 <sup>5</sup> Graduate School of Life Sciences, Toyo University, Itakura 374-0193, Japan

19 <sup>6</sup> School of Life Science and Technology, Tokyo Institute of Technology, Yokohama  
20 226-8501, Japan

21 <sup>7</sup> Plant Molecular Science Center, Chiba University, Chiba 260-8675, Japan

22 <sup>8</sup> Present address: Institute of Plant Molecular Biology, Centre National de la Recherche  
23 Scientifique, University of Strasbourg, Strasbourg 67084, France

24 <sup>9</sup> Lead contact

25 \*correspondence: [yazaki@rish.kyoto-u.ac.jp](mailto:yazaki@rish.kyoto-u.ac.jp)

26

27

28

29

30

31 **SUMMARY**

32 Plants produce a large variety of lipophilic metabolites, many of which are secreted by  
33 cells and accumulated in apoplasts. The mechanism of secretion remains largely  
34 unknown, because hydrophobic metabolites, which may form oil droplets or crystals in  
35 cytosol, inducing cell death, cannot be directly secreted by transporters. Moreover,  
36 some secondary metabolic lipids react with cytosolic components leading to their  
37 decomposition. Lipophilic metabolites should thus be solubilized by matrix lipids and  
38 compartmentalized by membrane lipids. The mechanism of lipophilic metabolite  
39 secretion was assessed using shikonin, a red naphthoquinone lipid, in *Lithospermum*  
40 *erythrorhizon*. Cell secretion of shikonin also involved the secretion of about 30% of  
41 triacylglycerol (TAG), composed predominantly of saturated fatty acids. Shikonin  
42 production was associated with the induction of large amounts of the membrane lipid  
43 phosphatidylcholine. Together with *in vitro* reconstitution, these findings suggest a  
44 novel role for TAG as a matrix lipid for the secretion of lipophilic metabolites.

45

46

47

48

49

50

51

52

53

54

55

56

57

58

59

60

61

62

63

## 64 INTRODUCTION

65 Lipids are essential constituents of all living cells. Unlike the other major  
66 constituents of cells (proteins, carbohydrates, and nucleic acids), lipids are loosely  
67 defined based on their physical properties, specifically, their hydrophobicity. Lipids can  
68 be extracted from plant cells with nonpolar organic solvents such as chloroform.  
69 Structurally, this class of compound is extremely diverse, ranging from low molecular  
70 weight metabolites to polymers like cutin. Most plant lipids of low molecular weight  
71 can be roughly divided into two types: fatty acid-derived lipids and isoprenoid  
72 compounds, synthesized from fatty acids by the glycerolipid biosynthetic and  
73 isoprenoid pathways, respectively (Ohlrogge and Browse, 1995). The primary  
74 metabolites triacylglycerol (TAG) and phospholipids function to store energy and as  
75 membrane components, respectively. Fatty acid-derived metabolites may also be used  
76 in the synthesis of signaling molecules, such as jasmonic acid, a plant hormone that  
77 plays a critical role in defense reactions. Isoprenoid compounds are particularly  
78 abundant and diverse in plants, with more than 50 000 compounds identified to date.  
79 Plant isoprenoids include specialized (secondary) metabolites, which participate in  
80 interactions between plants and organisms in their environment, including insects,  
81 fungi, and bacteria (Bartley and Scolnik, 1995; McGarvey and Croteau, 1995; Pulido et  
82 al., 2012). These lipophilic isoprenoids enhance the ability of individual plants to adapt  
83 to their habitats, for example, by defending plants against other biotic and abiotic  
84 stresses and by attracting beneficial organisms like pollinators (Yazaki et al., 2017).

85 Unlike water-soluble metabolites that generally accumulate in vacuoles, lipophilic  
86 compounds are often transported to extracellular spaces, such as epicuticular cavities in  
87 trichomes and apoplastic spaces of oil glands, in which they accumulate (Balcke et al.,  
88 2017). For example, citrus species produce large amounts of monoterpenes and  
89 furanocoumarins, which accumulate specifically in the oil cavities of pericarps, which  
90 are apoplastic spaces surrounded by epithelial cells (Voo et al., 2012). To date, however,  
91 the molecular mechanisms underlying both the excretion and accumulation of these  
92 hydrophobic secondary metabolites remain largely unknown (Samuels et al., 2008;  
93 Tissier et al., 2017). Biochemical approaches available to analyze the secretion of lipid  
94 molecules are limited, because these molecules are secreted by only certain types of  
95 cells, such as secretory cells in glandular trichomes and epidermal cells, and obtaining

96 sufficient numbers of these cells for biochemical analysis is difficult. The secretion of  
97 lipids from plant cells also beneficial that lipophilic metabolites remain stable in  
98 apoplastic spaces.

99 To analyze these fundamental biological events, we have used the shikonin  
100 production system of *Lithospermum erythrorhizon*. The roots of *L. erythrorhizon*, which  
101 produce large amounts of shikonin derivatives, have been traditionally used as a crude  
102 drug in East Asian countries. Shikonin derivatives have a variety of biological activities,  
103 including antibacterial, wound-healing, and anti-inflammatory properties and have been  
104 found to have previously undetected pharmacological activities, such as anti-  
105 topoisomerase activities (Yazaki, 2017). These red naphthoquinone derivatives, which  
106 are highly hydrophobic, are produced in large amounts and accumulate exclusively in  
107 root bark. *L. erythrorhizon* roots have also been utilized as a natural dye to stain clothes  
108 by use of a mordant.

109 *L. erythrorhizon* is a suitable model system to study hydrophobic lipid metabolite  
110 secretion for several reasons. First, these cells can be cultured in a cell suspension  
111 system capable of producing large amounts of shikonin derivatives (Yazaki et al., 1999).  
112 Second, the production of shikonin can be regulated by selection of medium and culture  
113 conditions, e. g., shikonin production is strongly induced in M9 medium (Fujita et al.,  
114 1981), but is completely inhibited in Linsmaier-Skoog (LS) medium, and light  
115 illumination inhibits shikonin production even in M9 medium. In addition, shikonin is  
116 exclusively secreted into apoplasts, and is visible as a red pigment under bright-field  
117 microscopy and as auto-fluorescence under confocal microscopy.

118 In this study, we thoroughly analyzed extracellular lipids of cultured *L.*  
119 *erythrorhizon* cells to identify lipid molecules facilitating the secretion of shikonin  
120 derivatives, as well as the types of membrane lipids are involved in the secretion of  
121 these lipophilic metabolites. We have found that a large proportion of TAG is secreted  
122 into extracellular spaces of cultured *L. erythrorhizon* cells, along with several polar  
123 lipids and shikonin derivatives. We also found that shikonin-containing oil droplets  
124 could be reconstructed *in vitro* with TAG and phospholipids. Taken together, these  
125 findings suggest that TAG plays a novel role as a matrix lipid for the secretion of  
126 lipophilic specialized metabolites.

127  
128

## 129 RESULTS

### 130 Behavior of naphthoquinones in living cells

131 Shikonin is present in *L. erythrorhizon* as ester derivatives with low molecular weight  
132 fatty acids (Figure 1A), primarily as acetylshikonin followed by  $\beta$ -  
133 hydroxyisovalerylshikonin (Oshikiri et al., 2020). All of these shikonin derivatives are  
134 highly hydrophobic and easily crystallized as needles when they are mixed with culture  
135 media or water. *L. erythrorhizon* cells producing shikonin derivatives in M9 medium are  
136 covered with secreted shikonin derivatives, which appear as numerous red granules in  
137 extracellular spaces (Figure 1B). In the presence of light illumination, a condition under  
138 which shikonin biosynthesis is strongly suppressed, cells lose their red color but  
139 extracellular granules are still present.

140 Transmission electron microscopy (TEM) showed characteristic ultrastructures on the  
141 walls of *L. erythrorhizon* cells producing shikonin (Figure 1C a). Chemical fixation  
142 showed that secreted shikonin derivatives in cultured cells were present as  
143 compartments filled with high electron-dense materials (Figure 1C b-d), similar to  
144 findings reported in cultured cells (Tsukada et al., 1984). To observe native structures,  
145 particularly on membrane structures, cultured *L. erythrorhizon* cells were subjected to  
146 high-pressure freezing and freeze substitution (HPF/FS) rather than chemical fixation  
147 (Figure 1C e, f and Figure S1). Although HPF/FS showed similar spherical structures of  
148 similar size as chemical fixation outside the cells, only the contours of these structures  
149 were detected following HPF/FS, because treatment with organic solvents in the latter  
150 dissolved and removed the contained materials, including shikonin derivatives. The  
151 HPF/FS method also showed two other important differences from chemical fixation: in  
152 the HPF/FS method, filamentous structures developed around the cell wall surface to  
153 which many spherical membrane structures are attached, and these membrane structures  
154 form bunches that fuse with each other to form large inner spaces (Figure S1a-f). These  
155 findings suggest that secreted shikonin derivatives are compartmentalized in oil droplets  
156 surrounded by membrane structures, thus maintaining the hydrophobic conditions of  
157 shikonin derivatives in extracellular spaces.

158 Even in intracellular spaces, shikonin derivatives are likely sequestered from water-  
159 soluble cytosolic components because crystals of shikonin derivatives that are toxic to  
160 cells are not observed inside the cells or in apoplasts. Shikonin derivatives have a strong  
161 potential to react with water-soluble cellular components (Figure 2A), leading to the

162 gradual decomposition of shikonin (Figure 2B). This decomposition proceeds slowly at  
163 room temperature but is accelerated at higher temperature, e.g., 50°C (Figure 2C).  
164 Nutrient inorganic cations and amino acids were therefore screened to determine the  
165 major components that affect the stability of shikonin derivatives (Figures 2D and 2E).  
166 Among cations, Fe was the most probable candidate because shikonin forms a dark  
167 purple color in the presence of Fe, which precipitates over time. Although Al and Cu  
168 ions also strongly changed the color of shikonin, these cations at the indicated  
169 concentrations are not present under physiological conditions or in culture medium, as  
170 they are highly toxic to plant cells. Of the 20 amino acids, only cysteine markedly  
171 changed the color of shikonin, suggesting that cysteine may be responsible in part for  
172 shikonin decomposition upon contact with cell sap (Romero et al., 2014). These  
173 findings suggest that Fe and cysteine in the cytosol can react with shikonin derivatives  
174 if these naphthoquinone compounds are not sequestered within membrane structures.  
175 Shikonin derivatives may coexist with lipid molecules that dissolve these hydrophobic  
176 red pigments and are surrounded with membrane lipids in both intracellular and  
177 extracellular spaces. We then attempted to analyze lipid molecules synthesized in *L.*  
178 *erythrorhizon* cells.

179

### 180 **Lipidomic analysis of extracellular lipid molecules highly produced upon shikonin** 181 **production of cultured *L. erythrorhizon* cells**

182 To determine the lipid molecules that contribute to shikonin secretion, we performed a  
183 comparative lipidomic analysis of *L. erythrorhizon* cells cultured under conditions that  
184 enhance (M9 medium, dark) or suppress (M9 medium, light; LS medium, dark)  
185 shikonin production. Each batch of cultured cells was divided into three fractions, i.e.,  
186 medium, cell surface, and cellular fractions as described in the Methods. Total lipids  
187 extracted from each fraction with chloroform and methanol were subjected to liquid  
188 chromatography-mass spectrometry (LC-MS) analysis. A total of 153 lipid species were  
189 detected in culture *L. erythrorhizon* cells, with Figure 3 showing heatmaps of lipid  
190 classes detected in these cells. Lipidomic analysis indicated that the production of all  
191 lipid classes except TAG was highly activated in shikonin-producing cells cultured in  
192 M9 medium in the dark. In particular, the production of phospholipids in the cellular  
193 fraction was higher in these shikonin-producing cells than in cells cultured under  
194 shikonin non-producing conditions (Figures 3 and S2). Phospholipids are major

195 constituents of cell membranes, including plasma membranes (PM) and organellar  
196 membranes. Epidermal cells in shikonin-producing hairy roots of *L. erythrorhizon*  
197 contain a highly developed endoplasmic reticulum (ER) network, in which shikonin  
198 derivatives are specifically produced (Tatsumi et al., 2016). Analysis of the cellular  
199 location of a key shikonin biosynthetic enzyme, *p*-hydroxybenzoate geranyltransferase  
200 (PGT), showed that GFP fusion proteins of two paralogues, LePGT1 and LePGT2, had  
201 the same distribution pattern as the ER marker GFP-h (Ueda et al., 2010) (Figure S3).  
202 This finding suggests that the key step in the biosynthesis of shikonin derivatives occurs  
203 in the ER. Importantly, after this reaction, the intermediates acquire hydrophobicity due  
204 to the geranyl chain (Yazaki et al., 2002; Ohara et al., 2013). Therefore, the presence of  
205 large amounts of phospholipids in shikonin-producing cells is in agreement with the  
206 development of the ER, which is responsible for the high production of shikonin. RNA  
207 sequencing data indicate that genes encoding glycerol-3-phosphatase acyltransferase  
208 (GPAT) are highly expressed in cultured *L. erythrorhizon* cells (Takanashi et al., 2019).  
209 These genes, including GPAT1, GPAT4/8 and GPAT9, are involved in the biosynthesis  
210 of extracellular lipids, such as cutin, in lysophosphatidic acid (LPA) synthesis from  
211 glycerol 3-phosphate and acyl-CoA (Jayawardhane et al., 2018), and in glycerolipid  
212 biosynthesis, respectively. These findings also indicate that shikonin-producing cells  
213 actively synthesize acylglycerols.

214       Appreciable amounts of TAG were detected outside the cells, both in the medium  
215 and cell surface fractions, under all culture conditions, regardless of shikonin production  
216 (Figures 3). These results suggest that *L. erythrorhizon* cells secrete large amounts of  
217 TAG into extracellular spaces. Generally, TAG accumulates in the cytoplasm as lipid  
218 droplets surrounded by a lipid monolayer, a structure conserved in a whole range of  
219 organisms, from archaea to mammals, including humans (Murphy, 2012; Ohsaki et al.,  
220 2014). This structure is also conserved in higher plants, with the storage of TAG being  
221 managed primarily by a universal subcellular organelle called the lipid droplet or oil  
222 body (Xu and Shanklin, 2016). Secretion of TAG from cells to extracellular spaces is,  
223 therefore, rarely reported in higher plants, but TAG is likely to act as a matrix lipid to  
224 solubilize shikonin derivatives in *L. erythrorhizon* cells. Therefore, we further analyzed  
225 secreted TAG in detail.

226

227 **Cultured *L. erythrorhizon* cells secrete TAG as granular structures into the**  
228 **extracellular space**

229 Field emission scanning electron microscopy (FE-SEM) showed that shikonin-  
230 producing cultured cells (M9 Dark) are covered with many small particles, 10–100 nm  
231 in diameter, together with larger granules, 1–3  $\mu\text{m}$  in diameter, and filamentous  
232 structures (Figure 4A a-c). In contrast, although some large granules are observed on the  
233 surfaces of shikonin non-producing cells (LS Dark), few small particles or filamentous  
234 structures were present (Figure 4A d-f).

235 To test whether these extracellular granular structures contain secreted lipids,  
236 cultured cells were stained with LipiDye, which is specific for lipid droplets, and the  
237 cells observed by confocal microscopy (Figure 4B). The location of secreted lipids was  
238 analyzed in detail by staining the PM and cell walls with FM4-64 and propidium iodide,  
239 respectively. The green fluorescence of LipiDye was detected outside both the FM4-64  
240 and propidium iodide fluorescence, although some LipiDye fluorescence adhered to the  
241 PM (Figure 4B a-c) and cell walls (Figure 4B d-f). These results support the above-  
242 described findings, that cultured *L. erythrorhizon* cells secrete TAG into the  
243 extracellular space, and that this TAG can be visualized as oil droplets.

244

245 **Secreted TAG is mainly composed of saturated fatty acids**

246 To quantitatively determine the amount of TAG secreted, TAG was isolated from each  
247 fraction of cultured cells by preparative thin-layer chromatography (TLC). TAG  
248 appeared between deoxyshikonin and  $\beta,\beta$ -dimethylacrylshikonin on the TLC plates  
249 (Figure S4). Following its isolation from these plates, TAG was analyzed by gas  
250 chromatography with a flame ionization detector (GC-FID). About 24-38% of the total  
251 amount of TAG produced by the cells was detected in extracellular spaces; i.e., the  
252 medium and surface fraction of the cells (Figure 5A). The TAG secretion rate did not  
253 differ markedly between shikonin-producing (M9 Dark) and non-producing (M9 Light,  
254 LS Dark) cells.

255 To investigate whether the secretion of TAG is unique to *L. erythrorhizon* cells or  
256 is present in various plant species, TAG amounts were compared in three fractions of  
257 cultured *Nicotiana tabacum* cells of strain Blight Yellow-2 (BY-2). GC-FID analysis  
258 showed that most of the TAG produced by BY-2 cells accumulated in the cells, with  
259 <5% present in the extracellular fractions (i.e., the medium and cell surface) (Figure



260 5B). These results suggest that the ability to secrete appreciable amounts of TAG into  
261 apoplastic spaces is unique to *L. erythrorhizon*.

262 TAG is an ester compound, composed of a glycerol moiety bound to three fatty acid  
263 molecules. The fatty acid composition was therefore compared in secreted TAG  
264 molecules and TAG molecules that accumulated inside the cells. TAG in the cellular  
265 fraction consisted mostly of unsaturated fatty acids, similar to storage lipids reported in  
266 many other plant species. In contrast, however, TAG secreted into the medium and on  
267 the cell surface consisted of approximately 90% saturated fatty acids (Figure 5C). The  
268 high representation of saturated fatty acids was observed in TAG secreted from both the  
269 shikonin-producing and shikonin-non-producing cells, indicating that the fatty acids  
270 composing secreted TAG molecules have a unique chemical feature.

271

### 272 **TAG and phospholipids encapsulate shikonin derivatives *in vitro***

273 Because secretion of the neutral lipid TAG into extracellular spaces implicated that  
274 TAG co-existed with shikonin derivatives, the ability of TAG to solubilize shikonin  
275 derivatives to form shikonin-containing lipid droplets was assessed *in vitro*. We  
276 attempted to prepare lipid droplet-like compartments with TAG and shikonin  
277 derivatives in the presence or absence of the phospholipid, phosphatidylcholine (PC).  
278 As a control, PC was mixed with triolein, a sort of TAG. The lipid compartment was  
279 stained with a neutral lipid-staining dye, BODI PY 493/503, with staining monitored by  
280 fluorescence microscopy. This mixture produced small compartments filled with  
281 triolein (Figure 6A, B), whereas mixing shikonin with PC did not result in any lipid  
282 droplet-like structures (Figure 6C). The mixture of all three components, shikonin, PC,  
283 and triolein, yielded shikonin-containing small compartments that could be detected by  
284 the auto-fluorescence of shikonin (Figure 6D). To evaluate the effect of the degree of  
285 TAG fatty acid saturation on shikonin solubilization, two additional TAG species,  
286 trilinolein and tristearin, were tested. Although the three TAG molecules composed of  
287 fatty acids of different saturation level showed nearly the same results (Figures 6D-F),  
288 the physical properties of these small particles differed slightly, depending on the  
289 degree of fatty acid saturation. Lipid particles containing tristearin tended to adhere to  
290 the microscope slides and were found to be aggregates of small particles (Figure 6F),  
291 suggesting that tristearin-containing lipid particles are more adherent than lipid particles  
292 containing unsaturated fatty acids. For further comparison, another fatty acid ester, oleyl

293 linoleate, was employed instead of TAG. However, shikonin was not encapsulated into  
294 the particles with oleyl linoleate, but crystallized in the buffer (Figure 6G), suggesting  
295 that oleyl linoleate is incapable of solubilizing shikonin, or at least of forming shikonin-  
296 containing particles. The mixture of shikonin and triolein without phospholipids yielded  
297 a large emulsion of shikonin, which was about 10 times larger than the above-  
298 mentioned PC-associated lipid particles (Figure 6H). Moreover, the intensity of  
299 shikonin auto-fluorescence of these large droplets was much lower than the intensity  
300 observed with the three components, PC, TAG, and shikonin. These results suggest that  
301 TAG has the ability to solubilize shikonin and enclose it in an oleophilic compartment.  
302 Moreover, membrane lipids, such as PC, are important for encapsulating shikonin in  
303 dense particles.

304

305

## 306 **DISCUSSION**

307 Plants produce a large variety of specialized metabolites and accumulate them in  
308 specialized tissues, cells, and organelles (Pichersky and Lewinsohn, 2011; Schenk and  
309 Last, 2019). In particular, some of these metabolites, utilized clinically as medicines,  
310 show lipophilic properties, such as paclitaxel and vincristine, because of their ability to  
311 permeate cell membranes. Lipophilicity is also important for compounds used in  
312 perfumes, most of which are volatile organic compounds such as monoterpenes and  
313 phenylpropenes, with lower molecular weight compounds being more volatile. Many of  
314 these lipophilic specialized metabolites are excreted into apoplastic spaces, where they  
315 accumulate. For example, monoterpenes and prenylated phloroglucinols are secreted by  
316 secretory cells into the epicuticular cavity in glandular trichomes (Turner et al., 2000).  
317 In addition, hydrophobic prenylated flavonoids show similar apoplastic accumulation  
318 (Yamamoto et al., 1996). Although much is known about the enzymes responsible for  
319 the biosynthesis of these hydrophobic metabolites, little is known to date about the  
320 molecular mechanisms underlying the secretion of these lipophilic metabolites by plant  
321 cells (Shitan, 2016; Tissier et al., 2017).

322 The present study used the shikonin production system of cultured *L. erythrorhizon*  
323 cells as a model to analyze the secretion of hydrophobic metabolites into extracellular  
324 spaces. This study found that TAG is secreted into extracellular spaces, acting as a lipid  
325 matrix to solubilize endogenous specialized metabolites, such as shikonin derivatives, in

326 lipophilic compartments surrounded by phospholipids. These results are in agreement  
327 with the sequestration of these highly lipophilic naphthoquinone metabolites from  
328 cytosol and medium. In this manner, shikonin derivatives do not directly contact  
329 cytosolic components like Fe ions or amino acids like cysteine.

330 In general, TAG is recognized as a storage lipid that accumulates in the cytosol as  
331 ‘oil bodies’, intracellular organelles often observed in sink organs (Shimada et al.,  
332 2018). These organelles provide a source of energy and precursors of primary  
333 metabolites during seed germination, thereafter playing a pivotal role in the early  
334 growth of seedlings. TAG is also responsible for the production of ATP, which is  
335 essential for stomatal opening in guard cells (McLachlan et al., 2016). The present study  
336 also suggests a new role of TAG, acting as a lipid carrier to facilitate the secretion of  
337 endogenous hydrophobic specialized metabolites from the cytosol to extracellular  
338 spaces. Shikonin biosynthesis occurs on ER membranes; i.e., after the geranylation of *p*-  
339 hydroxybenzoic acid, the intermediate is hydroxylated by P450 and finally esterified  
340 with an acyltransferase (Figure S3) (Yazaki et al., 2002; Oshikiri et al., 2020; Wang et  
341 al., 2019). Utilization of TAG as a matrix lipid is probably advantageous, because the  
342 biosynthesis of TAG also takes place on ER membrane, thus allowing both shikonin,  
343 and TAG to interact with each other to form shikonin-containing oil droplets.

344 Lipidomic and GC-FID analyses showed that *L. erythrorhizon* cells could secrete  
345 appreciable amounts of TAG (ca. 30% of total TAG produced) to extracellular spaces  
346 irrespective of shikonin production (Figure 3 and 5A), suggesting that these cultured  
347 cells constitutively secrete TAG. Because only epidermal cells in intact roots of this  
348 plant species can produce shikonin, the cultured cells are dedifferentiated maintaining  
349 the ability to produce and secrete shikonin derivatives. In contrast to shikonin  
350 biosynthesis, which is sensitive to illumination and ammonium ion, TAG synthesis and  
351 secretion by these cells are insensitive to both (Yazaki, 2017). FE-SEM showed that the  
352 number of extracellular particles was much higher in shikonin-producing cells than in  
353 shikonin non-producing cells (Figure 4A). Large amounts of membrane lipids are  
354 required to fill the entire surface area of lipophilic particles, in agreement with the  
355 increase in phospholipids following the induction of shikonin production in M9 medium  
356 (Figure 3).

357 In addition to cultured cells, hairy roots of *L. erythrorhizon* can secrete TAG  
358 (Figure S5). Few studies to date have assessed TAG secretion in higher plants. For

359 example, the surface of bayberry (*Myrica pensylvanica*) fruits is covered with a thick  
360 lipid layer, consisting primarily of TAG (Simpson et al., 2016). More generally,  
361 epidermal cells of terrestrial plants have the ability to secrete lipid compounds, such as  
362 the polymers cutin and wax, which protect plant bodies from dryness. Shikonin  
363 derivatives are also secreted exclusively by epidermal cells, perhaps by a pathway also  
364 responsible, at least in part, for the secretion of TAG. The TAG synthesis pathway may  
365 have evolved as an adaptation of cutin synthesis (Simpson and Ohlrogge, 2016). TAG  
366 may also be secreted by particular cells or tissues, other than those of *L. erythrorhizon*,  
367 from which lipophilic metabolites are secreted. A charophytic alga *Klebsormidium*  
368 *flaccidum* also secretes TAG, suggesting the need for studies of the evolutionary aspects  
369 of TAG secretion (Kondo et al., 2016).

370 Detailed analysis of its fatty acid composition revealed that TAG secreted by *L.*  
371 *erythrorhizon* is mainly composed of saturated fatty acids (Figure 5C). This finding is in  
372 agreement with the secreted TAG of bayberry fruits, which are also mainly composed  
373 of saturated fatty acids (Simpson and Ohlrogge, 2016). Aliphatic components of  
374 polymers in cuticular wax are synthesized from saturated, very long-chain fatty acids  
375 (Kunst and Samuels, 2003). The reason for the difference in secreted and stored TAG  
376 species is unclear, but their biosynthetic pathways likely differ, similar to findings in  
377 bayberry fruits (Simpson et al., 2016). TAG composed of saturated fatty acids may have  
378 biological advantages. Lipid particles containing tristearin are stickier than those  
379 containing triolein and trilinolein (Figure 6D-F). Many shikonin-containing particles  
380 adhere to the surface of in shikonin-producing cultured cells (Figure 1B middle panel).  
381 In intact *L. erythrorhizon* plants, shikonin derivatives accumulate at the boundary  
382 between root tissues and soil. By sticking to the root surface, secreted shikonin-  
383 containing droplets tightly cover root tissues acting as a chemical barrier. In addition,  
384 shikonin derivatives were reported to have antimicrobial properties (Brigham et al.,  
385 1999).

386 In recent years, plant extracellular vesicles have been actively studied. Extracellular  
387 vesicles are broadly defined as lipid-enveloped particles containing proteins, RNAs, and  
388 other metabolites (Cai et al., 2018; Pegtel and Gould, 2019; Liu et al., 2020). These  
389 vesicles, which can be classified by origin, function, and or size (diameter, 30-10,000  
390 nm), are thought to participate in various plant defense mechanisms (Rutter and Innes,  
391 2017; Regente et al., 2017). Extracellular shikonin-containing particles observed by

392 TEM and FE-SEM in this study are 10–100 nm in diameter, with bright light and  
393 fluorescence microscopy showing that they grow larger on the cell surface, to 1–3  $\mu\text{m}$ ,  
394 over time. Because shikonin derivatives are thought to be defense compounds, these  
395 shikonin-containing particles may be similar to extracellular vesicles. However, due to  
396 their high hydrophobicity, shikonin-containing particles may be similar to lipid-  
397 monolayer droplets, growing larger via fusion with each other in apoplastic spaces as  
398 observed under bright microscopy (Figure 1B middle panel). The present findings  
399 provide novel examples of lipid-containing extracellular vesicles in plants.

400 In conclusion, the present study showed that shikonin derivatives, as a model of  
401 extracellular hydrophobic specialized metabolites, are secreted with TAG from cells as  
402 droplets that are encapsulated by membrane lipids. These results provide perspectives  
403 for the role for TAG, which functions as carrier lipid for endogenous specialized  
404 metabolites to transport them to extracellular spaces. The rapid development of new  
405 analytical technologies has increased studies on the biochemistry and molecular biology  
406 of shikonin in *L. erythrorhizon* and related species (Wang et al., 2019; Ueoka et al.,  
407 2020; Oshikiri et al., 2020; Izuishi et al., 2020; Yamamoto et al., 2020; Song et al.,  
408 2021), including the sequences of their genomes (Tang et al., 2020; Auber et al., 2020).  
409 Further studies are needed to evaluate the molecular mechanisms by which TAG and  
410 shikonin are secreted at the plasma membrane, and the types of proteins involved in the  
411 secretion process.

412

### 413 **Limitations of the Study**

414 This study had several limitations. First, we were unable to analyze direct interactions  
415 between shikonin derivatives and TAG *in vivo*. To analyze the effects of lipid  
416 desaturation on shikonin secretion, we attempted to generate transgenic *L. erythrorhizon*  
417 hairy roots, in which endogenous fatty acid desaturase 2 (LeFAD2) and stearyl-ACP  
418 desaturase 1 (LeSAD1) were overexpressed or knocked down. However, we could not  
419 obtain any cell lines overexpressing these enzymes under the control of an estrogen  
420 inducible promoter (Zuo et al., 2000), and RNAi hairy roots did not grow on growth  
421 medium.

422

### 423 **Resource Availability**

### 424 **Lead Contact**

425 Requests for further information and for resources should be directed to and will be  
426 fulfilled by the Lead Contact, Kazufumi Yazaki ([yazaki@rishi.kyoto-u.ac.jp](mailto:yazaki@rishi.kyoto-u.ac.jp)).

427

#### 428 **Materials Availability**

429 Materials generated in this study are available from the Lead Contact with a completed  
430 Materials Transfer Agreement.

431

#### 432 **Data and Code Availability**

433 The datasets supporting the current study have not been deposited in a public repository  
434 because they are parts of further investigations. However, they are available from the  
435 corresponding author upon request.

436

#### 437 **METHODS**

##### 438 *Plant materials and growth condition*

439 Cultured cells (strain T-TOM) of *L. erythrorhizon* were maintained in Linsmaier-  
440 Skoog's (LS) medium, containing 3% sucrose,  $10^{-6}$  M potassium indole acetate (Nacalai  
441 Tesque, Kyoto, Japan) and  $10^{-5}$  M kinetin (Sigma, St. Louis, MO) at 25 °C, 80 rpm in  
442 darkness, with cells subcultured at 2-week intervals. To induce shikonin production,  
443 these cultured cells were transferred to M9 medium containing 3% sucrose (Fujita et al.,  
444 1981),  $10^{-6}$  M potassium indole acetate and  $10^{-5}$  M kinetin, and cultured in the dark or  
445 under illumination with the same agitation conditions.

446 Hairy roots of *L. erythrorhizon* were induced as described (Tatsumi *et al.*, 2020),  
447 and hairy root cultures were maintained in 1/2 Murashige-Skoog's medium with 3%  
448 sucrose at 25 °C, 80 rpm in the dark, with hairy roots subcultured at 2-week intervals.  
449 For shikonin production, these hairy roots were cultured in M9 medium without plant  
450 hormones for two weeks. Tobacco BY-2 (*Nicotiana tabacum* L. cv. Bright Yellow-2)  
451 cells were cultured in modified LS medium at 28 °C, 100 rpm in the dark, with cells  
452 subcultured at weekly intervals (Nagata et al., 1992).

453

##### 454 *Interaction of shikonin with water-soluble components of cell sap*

455 Cells cultured for 2 weeks in M9 medium in the dark or light, or in LS medium were  
456 subjected to a freeze-thaw process (frozen at -20°C and thawed at room temperature for  
457 30 min) thrice to destroy membrane structures. Each sample was homogenized with a

458 spatula in a glass vessel, which was centrifuged at 500 rpm for 1 min to obtain the cell  
459 sap as supernatant. A 300  $\mu$ L aliquot of standard shikonin solution (1 mM in 1-  
460 propanol) was mixed either with 100  $\mu$ L cell sap and allowed to stand for 2 weeks in the  
461 dark at room temperature. As a negative control, an aqueous solution of 100 mM KCl  
462 was used instead of cell sap. Each medium was also employed for comparison.  
463 Interactions of shikonin with cell sap was analyzed by normal phase TLC (silica gel 60  
464 F254, Merck Millipore, Darmstadt, Germany). In addition, a 20  $\mu$ L aliquot of each  
465 sample was spotted onto a TLC plate, which was developed with a 90 : 10 : 1 mixture  
466 of chloroform : methanol : formic acid.

467 The interactions of shikonin (standard) with metal ions were evaluated by mixing 1  
468 mM shikonin solution in 1-propanol with aqueous solutions of 100 mM KCl, MgCl<sub>2</sub>,  
469 CaCl<sub>2</sub>, AlCl<sub>3</sub>, MnCl<sub>2</sub>, FeSO<sub>4</sub>, CuCl<sub>2</sub>, and ZnCl<sub>2</sub> at a 3 : 1 (v/v) ratio. Because the red  
470 color of shikonin turns blue under alkaline conditions, the aqueous solution of each  
471 inorganic salt was confirmed to be at acidic pH, from pH 3.03 for FeSO<sub>4</sub> to pH 5.73 for  
472 MgCl<sub>2</sub>, indicating that any color change was not due to alkaline pH. As a control for  
473 blue color, 1 mM shikonin was mixed 3 : 1 (v/v) with 2.5% KOH.

474 Similarly, the interactions between shikonin and amino acids were evaluated by  
475 mixing 1 mM shikonin solution in 1-propanol with aqueous solutions of 100 mM of  
476 each amino acid at a 3 : 1 (v/v) ration. Because tyrosine, tryptophan, aspartic acid, and  
477 glutamic acid had to be dissolved in diluted HCl, as they were poorly soluble in water,  
478 diluted HCl was used as a negative control, as was KCl.

479 The effect of alcohol on the stability of shikonin derivatives in the extract was  
480 evaluated by the direct extraction of pigments from crude dried roots of *L.*  
481 *erythrorhizon*. Briefly, the dried roots were soaked in 95% ethanol, which was  
482 maintained at room temperature or at 50 °C. Extracts were spotted onto TLC plates after  
483 1 and 14 days, and the plates were developed with a solvent system composed of n-  
484 hexane : acetone : formic acid (80 : 20 : 1).

485

#### 486 *Lipid extraction*

487 Lipids of plant cells and tissues (cultured cells and hairy roots of *L. erythrorhizon* and  
488 BY-2 cells) were extracted into three parts, *i.e.*, medium, cell surface, and the rest of the  
489 cell fraction. The liquid cultures were filtered through Miracloth (Merck Millipore) to  
490 separate the culture medium (30 ml) from the cells or root tissues. The cultured medium

491 was partitioned with 15 ml of 2 : 1 (v/v) chloroform : methanol to yield organic phase  
492 (medium fraction). The harvested wet cells/tissues were rinsed with 15 ml of 2 :1 (v/v)  
493 chloroform-methanol and 30 ml distilled water by prompt everting of the glass vessel to  
494 recover the cell surface lipids (surface fraction). The remaining cells/tissues were  
495 completely dried and the lipids extracted with 2 ml of 2 :1 (v/v) chloroform-methanol to  
496 yield the cell fraction. Each fraction was evaporated under nitrogen stream before  
497 chromatographic analyses.

498

#### 499 *LC-MS analysis*

500 Before LC-MS analysis, lipid extracts were roughly separated into polar and non-polar  
501 lipids by thin-layer chromatography (TLC) using silica plates (TLC silica gel 60, Merck  
502 Millipore) developed with chloroform because the high amount of shikonin derivatives  
503 hampered the chemical analysis of TAG and polar lipids by LC-MS. Lipid samples,  
504 except for shikonin derivatives that could be recognized by their red color, were  
505 recovered from TLC plates and extracted with chloroform or methanol from the silica  
506 gel. The lipids were subjected to LC-q-TOF-MS (Waters, Boston, MA) analysis with an  
507 Acquity UPLC HSS T3 column (Waters), as described (Okazaki et al., 2013; Okazaki  
508 and Saito, 2018). Lipidomic analysis was performed using the data set recorded in the  
509 positive ion mode. Levels of lipid species were normalized relative to the intensity of  
510 the internal standard PC (20:0). To compare the amount of each lipid class among  
511 samples, the level of each lipid class, which is the sum of individual lipid species  
512 belonging to the class, was standardized by using the mean of cell fraction in LS Dark  
513 cultured cells.

514

#### 515 *GC-FID analysis*

516 To quantify TAG, TAG was purified by preparative TLC developed with 6 : 4 (v/v) n-  
517 hexane : diethyl ether. Following derivatization to fatty acid methyl esters using a fatty  
518 acid methylation kit (Nacalai Tesque), TAG was quantified by capillary gas  
519 chromatography GC-2014 (Shimadzu, Kyoto, Japan) with a J&W DB-23 capillary  
520 column (GL Science, Tokyo, Japan) as described (Kajikawa et al., 2015; 2016), with  
521 heptadecanoic acid (C17:0) used as the internal standard.

522

#### 523 *DNA cloning*



524 cDNA of cultured *L. erythrorhizon* cells was synthesized (Tatsumi et al., 2020) using  
525 KOD Plus Neo DNA polymerase (Toyobo, Osaka, Japan). An open reading frame  
526 (ORF) eliminating stop codon of the *LePGT2* gene was amplified, and the fragment was  
527 subcloned into pENTR/D-TOPO (Invitrogen, Carlsbad, CA) by in-fusion reaction  
528 (Clontech, Mountain View, CA) using a linearized vector. To obtain the plant  
529 expression vector for mGFP fusion, the cDNA fragment was cloned into the destination  
530 vector pGWB405m (Nakagawa et al., 2007; Segami et al., 2014) using LR clonase II  
531 (Invitrogen). Primers used for vector construction are listed in Table S1.

532

### 533 *LePGT1 and LePGT2 subcellular localization*

534 Plant vectors expressing LePGT1-mGFP (Tatsumi et al., 2020) and LePGT2-mGFP, as  
535 well as GFP-h (ER marker) (Ueda et al., 2010), were introduced into *Agrobacterium*  
536 *tumefaciens* (strain LBA4404) by the freeze-thaw transformation method. Each was  
537 transiently expressed in *N. benthamiana* leaves by agroinfiltration using transformed  
538 agrobacteria at OD<sub>600</sub> 0.1. Two days after infection, GFP fluorescence was detected.

539

### 540 *Staining with fluorescent dyes*

541 Stock solutions of LipiDye (1 mM; Funakoshi, Tokyo, Japan) and FM4-64 (40 mM;  
542 Invitrogen) were prepared in dimethyl sulfoxide, and a stock solution of propidium  
543 iodide (1 mg/mL; Wako, Osaka, Japan) was prepared in water. Cultured *L.*  
544 *erythrorhizon* cells were incubated with 2 μM (final concentration) LipiDye for 2 hours,  
545 and then with 80 μM FM4-64 or 6 μg/mL propidium iodide (final concentrations for  
546 both). To remove excess amounts of fluorescent dyes, the cells were gently washed with  
547 phosphate buffered saline. The cultured cells were monitored immediately after  
548 washing.

549

### 550 *Light microscopic analysis*

551 Light microscopic pictures of cultured *L. erythrorhizon* cells were captured by a  
552 Axioscope 2 (Zeiss, Oberkochen, Germany).

553

### 554 *Confocal microscope analysis*

555 LePGT-GFP of *N. benthamiana* leaves was monitored by excitation at 488 nm with a  
556 20 mW diode laser and emission at 500–540 nm. Images of *L. erythrorhizon* cultured

557 cell and lipid-containing particles were observed using a confocal laser scanning  
558 microscope FV3000 (Olympus, Tokyo, Japan) with a  $60 \times 0.75$  numerical aperture  
559 water immersion objective. LipiDye was monitored by excitation at 405 nm with a 50  
560 mW diode laser and emission at 521–530 nm. FM4-64 and propidium iodide were  
561 monitored by excitation at 561 nm with a 40 mW diode laser and emission at 570–670  
562 nm. The autofluorescence of shikonin was monitored by excitation at 561 nm with a 20  
563 mW diode laser and emission at 570–670 nm. BODI PY 493/503 (Molecular Probes,  
564 Eugene, OR) was monitored by excitation at 488 nm with a 20 mW diode laser and  
565 emission at 500–540 nm. Image acquisition and analysis were performed using FV31S-  
566 SW software and ImageJ software (<http://rsb.info.nih.gov/ij>). Signal intensity was  
567 determined by the Plot Profile tool of ImageJ.

568

#### 569 *Transmission electron microscopy*

570 Cultured cells were treated with 5 mM aluminum chloride for 3 h before chemical  
571 fixation of shikonin derivatives, as described (Tatsumi et al., 2016). High-pressure  
572 freezing and the freeze substitution method (HPF/FS) were performed as follows. Cells  
573 cultured in M9 or LS medium containing 3% sucrose were added to flat specimen  
574 carriers and frozen using a high-pressure freezing machine (Leica EM PACT, Leica  
575 Microsystems, Wetzlar, Germany). The frozen samples were transferred to 2% osmium  
576 tetroxide in anhydrous acetone at  $-80\text{ }^{\circ}\text{C}$  and incubated at  $-80\text{ }^{\circ}\text{C}$  for 6 days (120 h).  
577 These samples were warmed gradually from  $-80$  to  $-30\text{ }^{\circ}\text{C}$  over 5 h, warmed again from  
578  $-30$  to  $4\text{ }^{\circ}\text{C}$  over 3.4 h, and held at  $4\text{ }^{\circ}\text{C}$  for 2 h (Cryo Porter CS-80CP, Scinics  
579 Corporation, Tokyo, Japan). Subsequently, the samples were washed with acetone, and  
580 embedded in Epon812 resin (TAAB, Aldermaston, England). Ultrathin sections (60-80  
581 nm) were cut with a diamond knife on an ultramicrotome (Leica EM UC7, Leica  
582 Microsystems) and placed on formvar-coated copper grids. The ultrathin sections were  
583 stained with 4% uranyl acetate followed by lead citrate solution and observed with a  
584 JEM-1400 (JEOL Ltd., Tokyo, Japan) transmission electron microscope at 80 kV. Some  
585 sections were not stained with lead citrate to prevent excess staining.

586

#### 587 *Scanning electron microscopy*

588 Cultured cells were fixed with 2% glutaraldehyde, 50 mM sodium cacodylate buffer  
589 (pH 7.4) for 2 h at room temperature and then for 4 d at  $4\text{ }^{\circ}\text{C}$ . After post-fixation with

590 1% osmium tetroxide, 50 mM sodium cacodylate buffer, the samples were dehydrated  
591 in a graded methanol series (12.5, 25, 50, 75, 90, and 100%). The samples were  
592 infiltrated with isopentyl acetate, dried with a critical point dryer (CPD-030, Bal-tec,  
593 Balzers, Liechtenstein), and coated with osmium tetroxide in an osmium coater (HPC-  
594 1SW, Vacuum Device, Mito, Japan). The cells were subsequently monitored with a  
595 field emission scanning electron microscope (SU8220, Hitachi High-Tech, Tokyo,  
596 Japan) at 3 kV.

597

### 598 *Construction of lipid emulsion*

599 Lipid-containing particles were constructed as described (Arisawa et al., 2016),  
600 modified to allow the addition of shikonin derivatives to the particles. To construct  
601 shikonin-containing particles, PC (Wako) in methanol, either TAG molecule in 2 : 1  
602 (v/v) chloroform : methanol, and standard shikonin in chloroform were mixed in a  
603 molar ratio of 1 : 20 : 105. After drying under a nitrogen stream, the residue was  
604 resuspended in 150 mM NaCl, 50 mM Tris-HCl (pH 7.5), 1 mM EDTA, 1 mM  
605 dithiothreitol, and 50 mM phenylmethylsulfonyl fluoride solution and sonicated for 10  
606 sec three times (duty cycle 70%, output control 3) with a sonicator (Sonifier 250,  
607 Branson, Danbury, CT). The resulting lipid-containing particles were harvested by  
608 ultracentrifugation at 100,000 g for 15 min at 37 °C. Four types of neutral lipids were  
609 tested: triolein (C18:1×3), trilinolein (C18:2×3), tristearin (C18:0×3) and oleyl linoleate  
610 (Wako).

611

612

### 613 **ACKNOWLEDGMENTS**

614 The authors thank Dr. Hirobumi Yamamoto (Toyo University) for providing cultured *L.*  
615 *erythrorhizon* cells and Dr. Noboru Onishi (Kirin Holdings Company Limited) for  
616 providing *L. erythrorhizon* axenic shoots, which were used to generate hairy roots. The  
617 authors also thank Dr. Nam-Hai Chua (Rockefeller University) and Dr. Takashi  
618 Aoyama (Kyoto University) for providing the pTA7002 and pER8GW vectors. The  
619 authors also thank Dr. Takahiro Hamada (Okayama University of Science), Dr. Haruko  
620 Ueda, and Dr. Ikuko Hara-Nishimura (Konan University) for providing the  
621 pBI121\_GFP-h vector; and Dr. Shoji Segami (National Institute for Basic Biology) and  
622 Dr. Masayoshi Maeshima (Chubu University) for providing the pGWB405m vector.

623 The authors also thank Ms. Mayumi Wakazaki (RIKEN CSRS) and Mr. Kenta  
624 Kaminade (Kyoto University) for technical assistance with electron microscopy and  
625 plant cell cultures, respectively.

626 This work was funded by the Japan Society for the Promotion of Science (JSPS)  
627 KAKENHI to K.Y. (JP19H05638), a JSPS Research Fellowship for Young Scientists  
628 DC2 to K.T. (201811502), and the New Energy and Industrial Technology  
629 Development Organization (NEDO) to K.Y. (16100890-0).

630

631

### 632 **AUTHOR CONTRIBUTIONS**

633 K. Tatsumi, T.I., A.S., and K.Y. designed the research; K. Tatsumi., T.I., N.I., Y.O.,  
634 Y.H., M.K., and M.S. performed the experiments. K. Tatsumi, T.I., H.F., K. Toyooka,  
635 analyzed the data. H.O., K. Saito, and I.I. contributed new technical and analytical  
636 methods. K. Shimomura provided *L. erythrorhizon* axenic shoots for hairy root  
637 generation. K. Tatsumi, and K.Y. wrote the paper with critical input from K. Toyooka  
638 and M.S.

639

### 640 **DECLARATION OF INTERESTS**

641 The authors declare no competing interests.

642

643

### 644 **References**

645 Arisawa, K., Mitsudome, H., Yoshida, K., Sugimoto, S., Ishikawa, T., Fujiwara, Y., and  
646 Ichi, I. (2016). Saturated fatty acid in the phospholipid monolayer contributes to the  
647 formation of large lipid droplets. *Biochem. Biophys. Res. Commun.* 480, 641-647.

648

649 Auber, R.P., Suttiyut T., McCoy, R.M., Ghaste, M., Crook, J.W., Pendleton, A.L.,  
650 Widhalm, J.R., and Wisecaver, J.H. (2020). Hybrid de novo genome assembly of red  
651 gromwell (*Lithospermum erythrorhizon*) reveals evolutionary insight into shikonin  
652 biosynthesis. *Hortic. Res.* 7, 82.

653

654 Balcke, G.U., Bennewitz, S., Bergau, N., Athmer, B., Henning, A., Majovsky, P.,  
655 Jimenez-Gomez, J.M., Hoehenwarter, W., and Tissier, A. (2017). Multi-omics of

656 tomato glandular trichomes reveals distinct features of central carbon metabolism  
657 supporting high productivity of specialized metabolites. *Plant Cell* 29, 960-983.  
658  
659 Bartley, G.E., and Scolnik, P.A. (1995). Plant carotenoids: pigments for  
660 photoprotection, visual attraction, and human health. *Plant Cell* 7, 1027-1038.  
661  
662 Brigham, L.A., Michaels, P.J., and Flores, H.E. (1999). Cell-specific production and  
663 antimicrobial activity of naphthoquinones in roots of *Lithospermum erythrorhizon*.  
664 *Plant Physiol.* 119, 417-428.  
665  
666 Cai, Q., Qiao, L., Wang, M., He, B., Lin, F.M., Palmquist, J., Huang, S.D., and Jin, H.  
667 (2018). Plants send small RNAs in extracellular vesicles to fungal pathogen to silence  
668 virulence genes. *Science* 360, 1126-1129.  
669  
670 Fujita, Y., Hara, Y., Suga, C., and Morimoto, T. (1981). Production of shikonin  
671 derivatives by cell suspension cultures of *Lithospermum erythrorhizon* : II. A new  
672 medium for the production of shikonin derivatives. *Plant Cell Rep.* 1, 61-63.  
673  
674 Izuishi, Y., Isaka, N., Li, H., Nakanishi, K., Kageyama, J., Ishikawa, K., Shimada, T.,  
675 Masuta, C., Yoshikawa, N., Kusano, H., and Yazaki, K. (2020). Apple latent spherical  
676 virus (ALSV)-induced gene silencing in a medicinal plant, *Lithospermum*  
677 *erythrorhizon*, *Sci. Rep.* 10, 13555.  
678  
679 Jayawardhane, K.N., Singer, S.D., Weselake, R.J., and Chen, G. (2018). Plant sn-  
680 glycerol-3-phosphate acyltransferases: Biocatalysts involved in the biosynthesis of  
681 intracellular and extracellular lipids. *Lipids* 53, 469-480.  
682  
683 Kajikawa, M., Sawaragi, Y., Shinkawa, H., Yamano, T., Ando, A., Kato, M., Hirono,  
684 M., Sato, N., and Fukuzawa, H. (2015). Algal dual-specificity tyrosine phosphorylation-  
685 regulated kinase, triacylglycerol accumulation regulator1, regulates accumulation of  
686 triacylglycerol in nitrogen or sulfur deficiency. *Plant Physiol.* 168, 752-764.  
687

- 688 Kajikawa, M., Abe, T., Ifuku, K. Furutani, K.I., Yan, D., Okuda, T., Ando, A., Kishino,  
689 S., Ogawa, J., and Fukuzawa, H. (2016). Production of ricinoleic acid-containing  
690 monoestolide triacylglycerides in an oleaginous diatom, *Chaetoceros gracilis*. *Sci.*  
691 *Rep.* 6, 36809.
- 692
- 693 Kondo, S., Hori, K., Sasaki-Sekimoto, Y., Kobayashi, A., Kato, T., Yuno-Ohta, N.,  
694 Nobusawa, T., Ohtaka, K., Shimojima, M., and Ohta, H. (2016). Primitive extracellular  
695 lipid components on the surface of the charophytic alga *Klebsormidium flaccidum* and  
696 their possible biosynthetic pathways as deduced from the genome sequence. *Front Plant*  
697 *Sci.* 7, 952.
- 698
- 699 Kunst, L., and Samuels, A.L. (2003). Biosynthesis and secretion of plant cuticular wax.  
700 *Prog. Lipid Res.* 42, 51-80.
- 701
- 702 Liu, N.J., Wang, N., Bao, J.J., Zhu, H.X., Wang, L.J., and Chen, X.Y. (2020).  
703 Lipidomic analysis reveals the importance of GIPCs in Arabidopsis leaf extracellular  
704 vesicles. *Mol. Plant* 13, 1523-1532.
- 705
- 706 McGarvey, D.J., and Croteau, R. (1995). Terpenoid metabolism. *Plant Cell* 7, 1015-  
707 1026.
- 708
- 709 McLachlan, D.H., Lan, J., Geilfus, C.M., Dodd, A.N., Larson, T., Baker, A., Horak, H.,  
710 Kollist, H., He, Z., Graham, I., *et al.* (2016). The breakdown of stored triacylglycerols is  
711 required during light-induced stomatal opening. *Curr. Biol.* 26, 707-712.
- 712
- 713 Murphy, D.J. (2012). The dynamic roles of intracellular lipid droplets: from archaea to  
714 mammals. *Protoplasma* 249, 541-585.
- 715
- 716 Nagata, T., Nemoto, Y., and Hasezawa, S. (1992). Tobacco BY-2 cell line as the ‘HeLa’  
717 cell in the cell biology of higher plants. *Int. Rev. Cytol.* 132, 1-30.
- 718
- 719 Nakagawa, T., Suzuki, T., Murata, S., Nakamura, S., Hino, T., Maeo, K., Tabata, R.,  
720 Kawai, T., Tanaka, K., Niwa, Y., Watanabe, Y., Nakamura, K., Kimura, T., and Ishiguro,

- 721 S. (2007). Improved gateway binary vectors: high-performance vectors for creation of  
722 fusion constructs in transgenic analysis of plants. *Biosci. Biotechnol. Biochem.* *71*, 2095-  
723 2100.
- 724
- 725 Ohara, K., Mito, K., Yazaki, K. (2013). Homogeneous purification and characterization  
726 of LePGT1 -- a membrane-bound aromatic substrate prenyltransferase involved in  
727 secondary metabolism of *Lithospermum erythrorhizon*, *FEBS J.*, *280*, 2572-2580.
- 728
- 729 Ohlrogge, J., and Browse, J. (1995). Lipid biosynthesis. *Plant Cell* *7*, 957-970.
- 730
- 731 Ohsaki, Y., Suzuki, M., and Fujimoto, T. (2014). Open questions in lipid droplet  
732 biology. *Chem. Biol.* *21*, 86-96.
- 733
- 734 Okazaki, Y., Kamide, Y., Hirai, M.Y., and Saito, K. (2013). Plant lipidomics based on  
735 hydrophilic interaction chromatography coupled to ion trap time-of-flight mass  
736 spectrometry. *Metabolomics* *9*, 121-131.
- 737
- 738 Okazaki, Y., and Saito, K. (2018). Plant lipidomics using UPLC-QTOF-MS. *Methods*  
739 *Mol. Biol.* *1778*, 157-169.
- 740
- 741 Oshikiri, H., Watanabe, B., Yamamoto, H., Yazaki, K., and Takanashi, K. (2020). Two  
742 BAHD acyltransferases catalyze the last step in the shikonin/alkannin biosynthetic  
743 pathway, *Plant Physiol.* *184*, 753-761.
- 744
- 745 Pegtel, D.M., and Gould, S.J. (2019). Exosomes. *Annu. Rev. Biochem.* *88*, 487-514.
- 746
- 747 Pichersky, E., and Lewinsohn, E. (2011). Convergent evolution in plant specialized  
748 metabolism. *Annu. Rev. Plant Biol.* *62*, 549-566.
- 749
- 750 Pulido, P., Perello, C., and Rodriguez-Concepcion, M. (2012). New insights into plant  
751 isoprenoid metabolism. *Mol. Plant* *5*, 964-967.
- 752

- 753 Regente, M., Pinedo, M., San Clemente, H., Balliau, T., Jamet, E., and de la Canal, L.  
754 (2017). Plant extracellular vesicles are incorporated by a fungal pathogen and inhibit its  
755 growth. *J. Exp. Bot.* *68*, 5485-5495.  
756
- 757 Romero, L.C., Aroca, M.Á., Laureano-Marín, A.M., Moreno, I., García, I., and Gotor,  
758 C. (2014). Cysteine and cysteine-related signaling pathways in *Arabidopsis thaliana*.  
759 *Mol. Plant* *7*, 264-276.  
760
- 761 Rutter, B.D., and Innes, R.W. (2017). Extracellular vesicles isolated from the leaf  
762 apoplast carry stress-response proteins. *Plant Physiol.* *173*, 728-741.  
763
- 764 Samuels, L., Kunst, L., and Jetter, R. (2008). Sealing plant surfaces: cuticular wax  
765 formation by epidermal cells. *Annu. Rev. Plant Biol.* *59*, 683-707.  
766
- 767 Schenck, C.A., and Last, R.L. (2020). Location, location! cellular relocalization primes  
768 specialized metabolic diversification. *FEBS J.* *287*, 1359-1368.
- 769 Segami, S., Makino, S., Miyake, A., Asaoka, M., and Maeshima, M. (2014). Dynamics  
770 of vacuoles and H<sup>+</sup>-pyrophosphatase visualized by monomeric green fluorescent protein  
771 in *Arabidopsis*: artifactual bulbs and native intravacuolar spherical structures. *Plant Cell*  
772 *26*, 3416-3434.  
773
- 774 Shimada, T.L., Hayashi, M., and Hara-Nishimura, I. (2018). Membrane dynamics and  
775 multiple functions of oil bodies in seeds and leaves. *Plant Physiol.* *176*, 199-207.  
776
- 777 Shitan, N. (2016). Secondary metabolites in plants: transport and self-tolerance  
778 mechanisms. *Biosci. Biotechnol. Biochem.* *80*, 1283-1293.  
779
- 780 Simpson, J.P., and Ohlrogge, J.B. (2016). A novel pathway for triacylglycerol  
781 biosynthesis is responsible for the accumulation of massive quantities of glycerolipids  
782 in the surface wax of bayberry (*Myrica pensylvanica*) fruit. *Plant Cell* *28*, 248-264.  
783



- 784 Simpson, J.P., Thrower, N., and Ohlrogge, J.B. (2016). How did nature engineer the  
785 highest surface lipid accumulation among plants? Exceptional expression of acyl-lipid-  
786 associated genes for the assembly of extracellular triacylglycerol by bayberry (*Myrica*  
787 *pensylvanica*) fruits. *Biochim. Biophys. Acta* 1861, 1243-1252.
- 788
- 789 Song, W., Zhuang, Y., and Liu, T. (2021). CYP82AR subfamily proteins catalyze C-1'  
790 hydroxylations of deoxyshikonin in the biosynthesis of shikonin and alkannin. *Org.*  
791 *Lett.* 23, 2455-2459.
- 792
- 793 Takanashi, K., Nakagawa, Y., Aburaya, S., Kaminade, K., Aoki, W., Saida-Munakata  
794 Y., Sugiyama, A., Ueda, M., and Yazaki, K. (2019). Comparative proteomic analysis of  
795 *Lithospermum erythrorhizon* reveals regulation of a variety of metabolic enzymes  
796 leading to comprehensive understanding of the shikonin biosynthetic pathway. *Plant*  
797 *Cell Physiol.* 60, 19-28.
- 798
- 799 Tang, C.Y., Li, S., Wang, Y.T., and Wang X. (2020). Comparative  
800 genome/transcriptome analysis probes Boraginales' phylogenetic position, WGDs in  
801 Boraginales, and key enzyme genes in the alkannin/shikonin core pathway. *Mol. Ecol.*  
802 *Resour.* 20, 228-241.
- 803
- 804 Tatsumi, K., Yano, M., Kaminade, K., Sugiyama, A., Sato, M., Toyooka, K., Aoyama,  
805 T., Sato, F., and Yazaki, K. (2016). Characterization of shikonin derivative secretion in  
806 *Lithospermum erythrorhizon* hairy roots as a model of lipid-soluble metabolite secretion  
807 from plants. *Front. Plant Sci.* 7, 1066.
- 808
- 809 Tatsumi, K., Ichino, T., Onishi, N., Shimomura, K., and Yazaki, K. (2020). Highly  
810 efficient method of *Lithospermum erythrorhizon* transformation using domestic  
811 *Rhizobium rhizogenes* strain A13. *Plant Biotechnol. (Tokyo)* 37, 39-46.
- 812
- 813 Tissier, A., Morgan, J.A., and Dudareva, N. (2017). Plant volatiles: going 'in' but not  
814 'out' of trichome cavities. *Trends Plant Sci.* 22, 930-938.

- 815 Tsukada, M., and Tabata, M. (1984). Intracellular localization and secretion of  
816 naphthoquinone pigments in cell cultures of *Lithospermum erythrorhizon*. *Planta Med.*  
817 *50*, 338-341.
- 818 Turner, G.W., Gershenzon, J., and Croteau, R.B. (2000). Development of peltate  
819 glandular trichomes of peppermint. *Plant Physiol.* *124*, 665-680.  
820
- 821 Ueda, H., Yokota, E., Kutsuna, N., Shimada, T., Tamura, K., Shimmen, T., Hasezawa,  
822 S., Dolja, V.V., and Hara-Nishimura, I. (2010). Myosin-dependent endoplasmic  
823 reticulum motility and F-actin organization in plant cells. *Proc. Natl. Acad. Sci. U. S. A.*  
824 *107*, 6894-6899.  
825
- 826 Ueoka, H., Sasaki, K., Miyawaki, T., Ichino, T., Tatsumi, K., Suzuki, S., Yamamoto,  
827 H., Sakurai, N., Suzuki, H., Shibata, D., and Yazaki, K. (2020). A cytosol-localized  
828 geranyl diphosphate synthase from *Lithospermum erythrorhizon* and its molecular  
829 evolution, *Plant Physiol.* *182*, 1933-1945.  
830
- 831 Voo, S.S., Grimes, H.D., and Lange, B.M. (2012). Assessing the biosynthetic  
832 capabilities of secretory glands in citrus peel. *Plant Physiol.* *159*, 81-94.  
833
- 834 Wang, S., Wang, R., Liu, T., Lv, C., Liang, J., Kang, C., Zhou, L., Guo, J., Cui, G.,  
835 Zhang, Y., Werck-Reichhart, D., Guo, L., and Huang, L. (2019). CYP76B74 catalyzes  
836 the 3"-hydroxylation of geranylhydroquinone in shikonin biosynthesis. *Plant Physiol.*  
837 *179*, 402-414.  
838
- 839 Xu, C., and Shanklin, J. (2016). Triacylglycerol metabolism, function, and  
840 accumulation in plant vegetative tissues. *Annu. Rev. Plant Biol.* *29*, 179-206.  
841
- 842 Yamamoto, H., Yamaguchi, M., and Inone, K. (1996). Absorption and increase in the  
843 production of prenylated flavanones in *Sophora flavescens* cell suspension cultures by  
844 cork pieces. *Phytochemistry* *43*, 603-608.  
845

846 Yamamoto, H., Tsukahara, M., Yamano, Y., Wada, A., and Yazaki, K. (2020) Alcohol  
847 dehydrogenase activity converts 3"-hydroxy-geranylhydroquinone to an aldehyde  
848 intermediate for shikonin and benzoquinone derivatives in *Lithospermum erythrorhizon*,  
849 *Plant Cell Physiol.* *61*, 1798-1806.  
850  
851 Yazaki, K. (2017). *Lithospermum erythrorhizon* cell cultures: Present and future  
852 aspects. *Plant Biotechnol. (Tokyo)* *34*: 131–142  
853  
854 Yazaki, K., Arimura, G.I., and Ohnishi, T. (2017). 'Hidden' terpenoids in plants: Their  
855 biosynthesis, localization and ecological roles. *Plant Cell Physiol.* *58*, 1615-1621.  
856  
857 Yazaki, K., Kuniyama, M., Fujisaki, T., and Sato, F. (2002). Geranyl diphosphate:4-  
858 hydroxybenzoate geranyltransferase from *Lithospermum erythrorhizon*. Cloning and  
859 characterization of a key enzyme in shikonin biosynthesis. *J. Biol. Chem.* *277*, 6240-  
860 6246.  
861  
862 Yazaki, K., Matsuoka, H., Ujihara, T., and Sato, F. (1999). Shikonin biosynthesis in  
863 *Lithospermum erythrorhizon*, *Plant Biotechnol. (Tokyo)* *16*, 335-342.  
864  
865 Zuo, J., Niu, Q.W., and Chua, N.H. (2000). Technical advance: An estrogen receptor-  
866 based transactivator XVE mediates highly inducible gene expression in transgenic  
867 plants. *Plant J.* *24*, 265-273.  
868

869 **Figure legends**

870 **Figure 1.** Shikonin-producing cells of *L. erythrorhizon* cultured in M9 medium.

871 (A) Chemical structures of representative shikonin derivatives produced by cultured *L.*  
872 *erythrorhizon* cells. Shikonin has an *R*-configuration at the hydroxyl group on the  
873 prenyl chain, with the cultured cells also producing the (*S*)-isomer, called alkannin.

874 (B) Bright-field micrographs of cultured *L. erythrorhizon* cells. LS medium was a  
875 negative control, in which shikonin was not produced (left panel). Shikonin derivatives  
876 were compartmentalized in the red granules attached to the surface of cells cultured in  
877 M9 medium in the dark (middle panel), whereas cells cultured under illumination are  
878 incapable of producing shikonin (right panel). Bars = 20  $\mu\text{m}$ .

879 (C) TEM images of shikonin-producing cells of *L. erythrorhizon*. Many characteristic  
880 spherical particles were attached to the cell walls. These cultured cells were treated with  
881 5 mM aluminum chloride before fixation and then fixed by standard chemical fixation  
882 (a-d) or the HPF/FS method (e, f). Rectangles (i, ii) in (a) depict the enlarged areas in  
883 (b) and (c), respectively. Rectangles in (c) and (e) depict the enlarged areas shown in (d)  
884 and (f), respectively. Bars = 20  $\mu\text{m}$  (a), 10  $\mu\text{m}$  (e), 1  $\mu\text{m}$  (b, c, f), 500 nm (d). CW, cell  
885 wall.

886

887 **Figure 2.** Interactions of cytosolic components with shikonin.

888 (A) Color changes of shikonin samples mixed with fresh culture media or cell sap of *L.*  
889 *erythrorhizon* cells cultured in either medium. KCl was used as a negative control.

890 (B) Thin-layer chromatography (TLC) analysis of shikonin (standard) mixed with fresh  
891 culture media or cell sap. Normal phase TLC was developed with 90 : 10 : 1  
892 chloroform : methanol : formic acid. The samples were kept at 25 °C for 2 weeks. The  
893 color change reflects the decomposition of shikonin derivatives.

894 (C) TLC analysis (normal phase) of shikonin derivatives coextracted with cell sap (M9  
895 dark culture). The solvent system was as in (B), above. Shikonin derivatives detected  
896 are indicated on the left of TLC. The samples were kept at room temperature (RT), or at  
897 50 °C to accelerate the reaction over the time indicated. The parentheses highlight the  
898 disappearance of shikonin derivatives and the arrows indicate the generation of  
899 decomposed bluish pigments after 14 days at 50 °C.

900 (D) Standard shikonin samples (0.75 mM) were incubated with 25 mM of each  
901 inorganic cation. KOH is an alkaline solution used for colorimetric assay of shikonin

902 content. At acidic pH, the color of shikonin was unaffected, with the pH of all solutions  
903 of inorganic cations being acidic (pH 3.0–5.7) before mixing with shikonin.

904 (E) Each amino acid was mixed with a standard shikonin sample. KCl and HCl were  
905 used as negative controls, with the color of shikonin beings unaffected.

906

907 **Figure 3.** Heat map representation of lipid classes in cultured *L. erythrorhizon* cells  
908 along with the glycerolipid metabolic pathway.

909 Average changes in lipid classes are shown by nine boxes (three rows and three  
910 columns), which represent three different culture conditions; LS Dark (upper row), M9  
911 Dark (middle row), and M9 Light (lower row); and three fractions: cell, surface, and  
912 medium (left-to-right). Heat map colors reveal the average log ratios of fold-changes  
913 relative to cell fraction of the LS Dark condition (control). PC, phosphatidylcholine;  
914 lysoPC, lysophosphatidylcholine; PE, phosphatidylethanolamine; lysoPE,  
915 lysophosphatidylethanolamine; PG, phosphatidylglycerol; PI, phosphatidylinositol;  
916 SQDG, sulfoquinovosyldiacylglycerol; MGDG, monogalactosyldiacylglycerol; DGDG,  
917 digalactosyldiacylglycerol; TAG, triacylglycerol; DAG, diacylglycerol; Acyl-ACP,  
918 acyl-acyl carrier protein; FAS, fatty acid synthase.

919

920 **Figure 4.** Extracellular particles/granules of cultured *L. erythrorhizon* cells.

921 (A) FE-SEM images of cultured *L. erythrorhizon* cells. (a-c) Shikonin-producing cells  
922 cultured in M9 medium in the dark with different enlargements. (d-f) Shikonin-non-  
923 producing cells cultured in LS medium in the dark. Panels (b) and (c) and (e) and (f) are  
924 enlargements of panels (a) and (d), respectively, with enlarged areas indicated by  
925 squares in (a), (b), (d), and (e). Bars = 20  $\mu\text{m}$  (a, d), 5  $\mu\text{m}$  (b, e), 1  $\mu\text{m}$  (c, f).

926 (B) Confocal microscopic images of cultured *L. erythrorhizon* cells stained with  
927 LipiDye (pseudocolor green). The PM and cell wall were labeled with FM4-64 (a-c;  
928 pseudocolor magenta) and propidium iodide (PI) (d-f; pseudocolor magenta). Z-stack  
929 images were captured at 1  $\mu\text{m}$  intervals. Images at xy (a, d) and xz (b, e) views are  
930 shown. The blue lines in (a, d) indicate the y axis of (b, e). Signal intensities according  
931 to the blue line in (b) and (e) are presented in (c) and (f), respectively. Bars = 50  $\mu\text{m}$ .

932

933 **Figure 5.** Analysis of TAG molecules secreted by *L. erythrorhizon* cells.

934 (A) Quantitative analysis of TAG in three fractions of *L. erythrorhizon* cells: medium,

935 cell surface, and inside cells. Each point represents the mean of five biological  
936 replicates. Open circles represent the individual values of each repeat. Error bars  
937 represent the standard deviation (SD).

938 (B) Quantitative analysis of TAG in BY-2 cultured cells. Each point represents the mean  
939 of three biological replicates. Open circles represent the individual values of each  
940 repeat. Error bars represent the SD.

941 (C) Fatty acid composition of TAG recovered from three fractions of *L. erythrorhizon*  
942 cells: medium, cell surface, and inside cells. Each point represents the mean of five  
943 biological replicates. Error bars represent the SD.

944

945 **Figure 6.** *In vitro* reconstruction of shikonin-containing red droplets with TAG.

946 Lipid particles containing shikonin were constructed by mixing shikonin, TAG, and  
947 phospholipid phosphatidylcholine (PC). Three different types of TAG were used;  
948 triolein, trilinolein, tristearin. The lipid particles were observed by confocal microscopy.  
949 Bars = 20  $\mu\text{m}$  (a, b, c, g, h), 5  $\mu\text{m}$  (d, e, f)

950

951

## 952 **Supplemental Figures**

953 **Figure S1.** Transmission electron micrographs of cultured *L. erythrorhizon* cells fixed  
954 with the HPF/FS method. Enlarged parts of a cell in (a) are indicated with white squares  
955 (b - d). Panels (e, f) are of different cells from (a), showing frequently seen bunches of  
956 characteristic extracellular structures. Panels (g) and (h) highlight small electron-dense  
957 particles inside the cell walls, in which cultured cells were treated with 5 mM aluminum  
958 chloride before fixation to fix shikonin derivatives. CW, cell wall. Scale bars are: a, 2  
959  $\mu\text{m}$ ; b, d, e, 500 nm; c, g, h, 200 nm; f, 1  $\mu\text{m}$ .

960

961 **Figure S2.** Relative signal intensity of each lipid class. The values of fraction in LS  
962 Dark cells (shikoinn-non-producing) were set to 1 for each lipid class. Black dots  
963 represent individual values of each repeat (n = 3; LS Dark, n =4; M9 Dark and M9  
964 Light). PC, phosphatidylcholine; lysoPC, lysophosphatidylcholine; PE,  
965 phosphatidylethanolamine; lysoPE, lysophosphatidylethanolamine; PG,  
966 phosphatidylglycerol; PI, phosphatidylinositol; SQDG, sulfoquinovosyldiacylglycerol;  
967 MGDG, monogalactosyldiacylglycerol; DGDG, digalactosyldiacylglycerol.

968

969 **Figure S3.** Subcellular localization of LePGT expressed in *N. benthamiana* epidermal  
970 cells.

971 Confocal microscopic images of LePGT1-mGFP (A), LePGT2-mGFP (B), and GFP-h  
972 (C) transiently expressed in epidermal cells of *N. benthamiana* leaves by  
973 agroinfiltration. Bars = 10  $\mu$ m

974

975 **Figure S4.** Normal phase thin-layer chromatography (TLC) analysis of lipid fraction  
976 from *L. erythrorhizon* cells cultured in M9. The TLC was developed with n-hexane:  
977 diethyl ether (6 : 4, v/v). (Left) Without staining, with shikonin derivatives appearing as  
978 red spots; (right) following staining with I<sub>2</sub> vapor after separation, showing TAG spots.  
979 Shikonin derivatives identified in standard specimens are also indicated on the right.

980

981 **Figure S5.** Normal phase thin-layer chromatography (TLC) analysis of lipids extracted  
982 from hairy roots of *L. erythrorhizon*. The TLC was developed with n-hexane: diethyl ether  
983 (7: 3, v/v). (Left) Without staining; (right) after staining with 80% (v/v) aqueous acetone  
984 containing 0.01% (w/v) primuline. Yellow arrowheads indicate TAG spots.

985

986 **Table S1.** Primers used for LePGT2 gene construction.

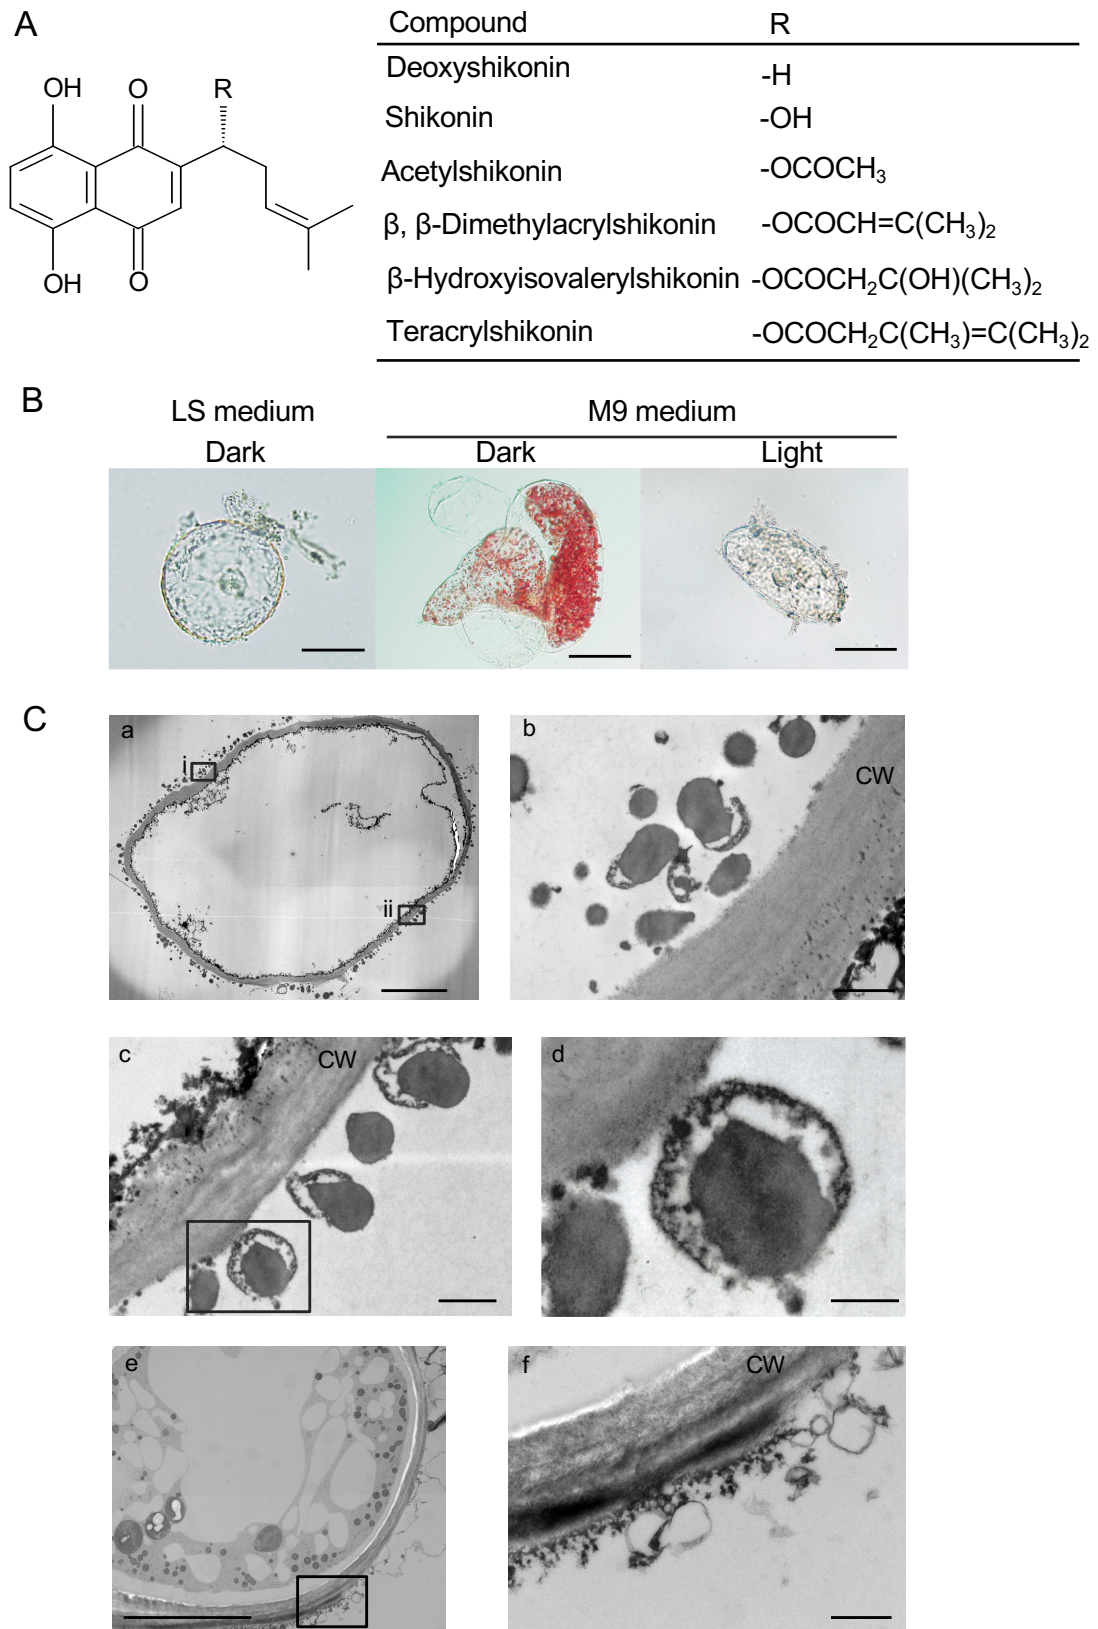

Figure 1



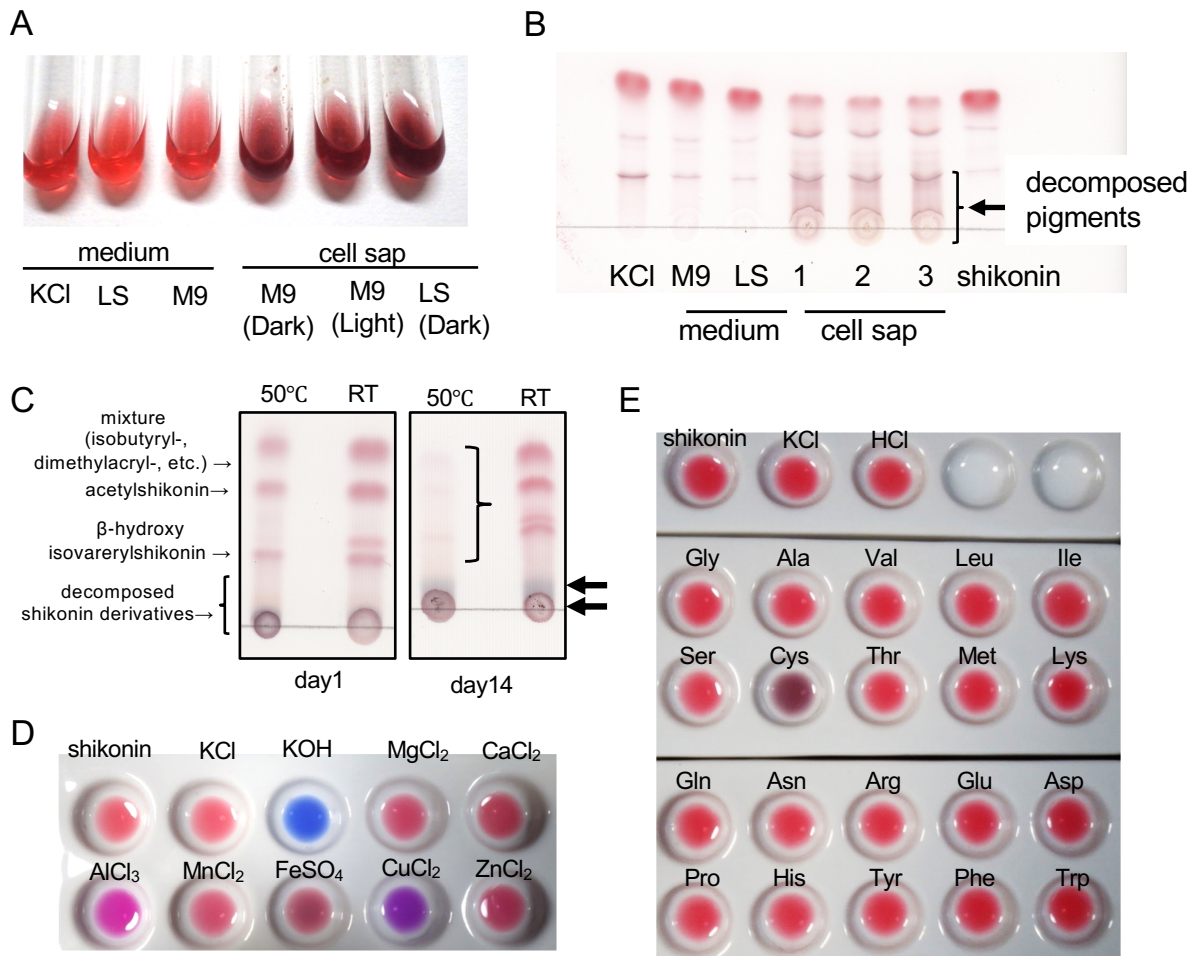

Figure 2

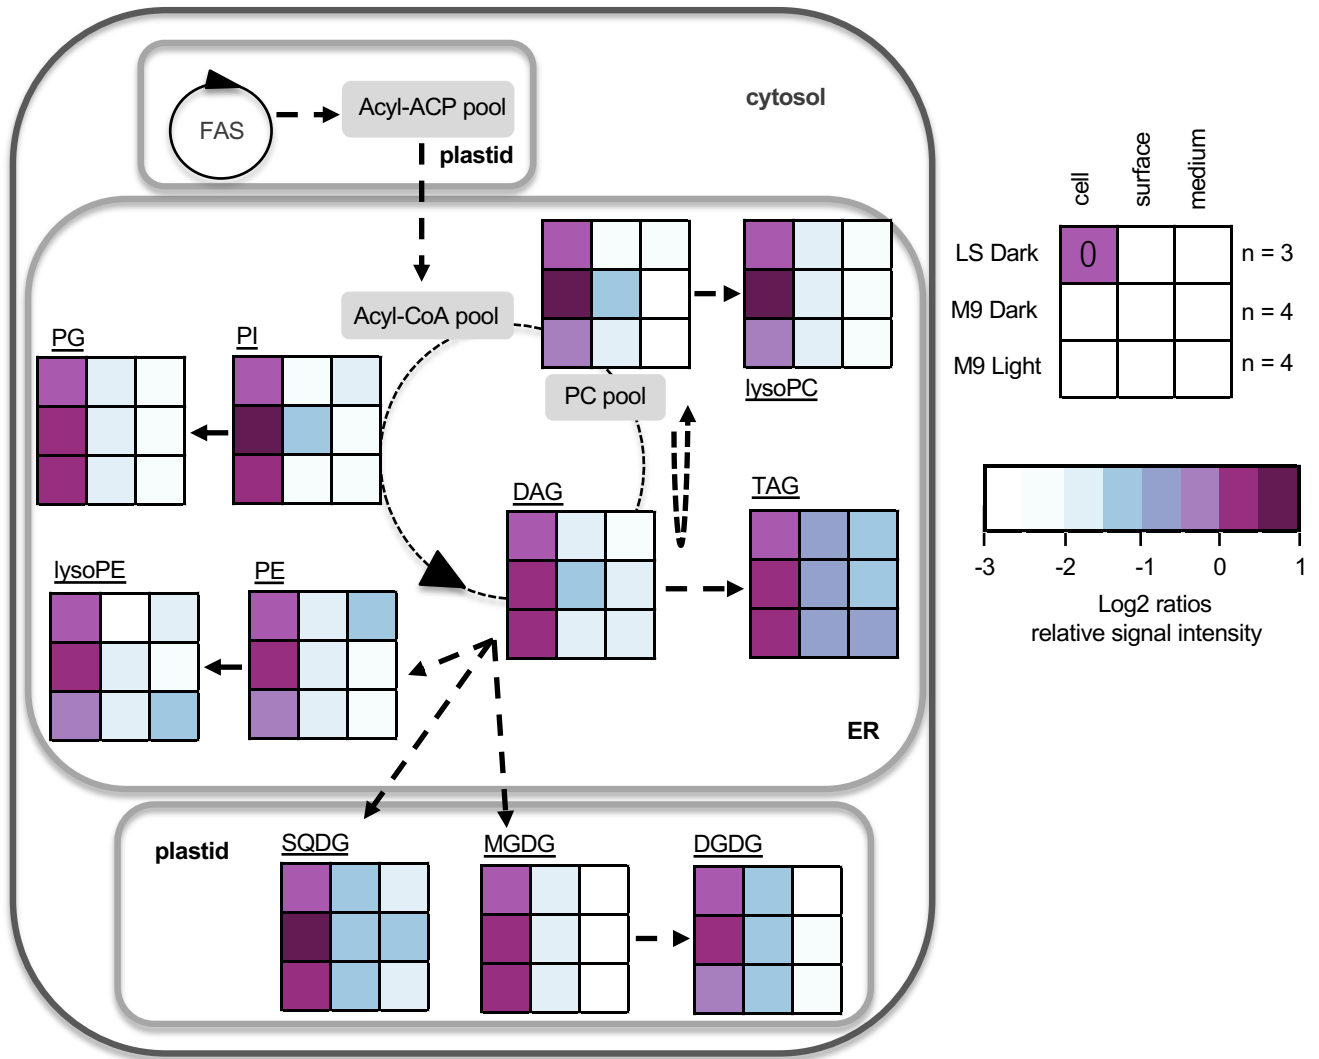

Figure 3

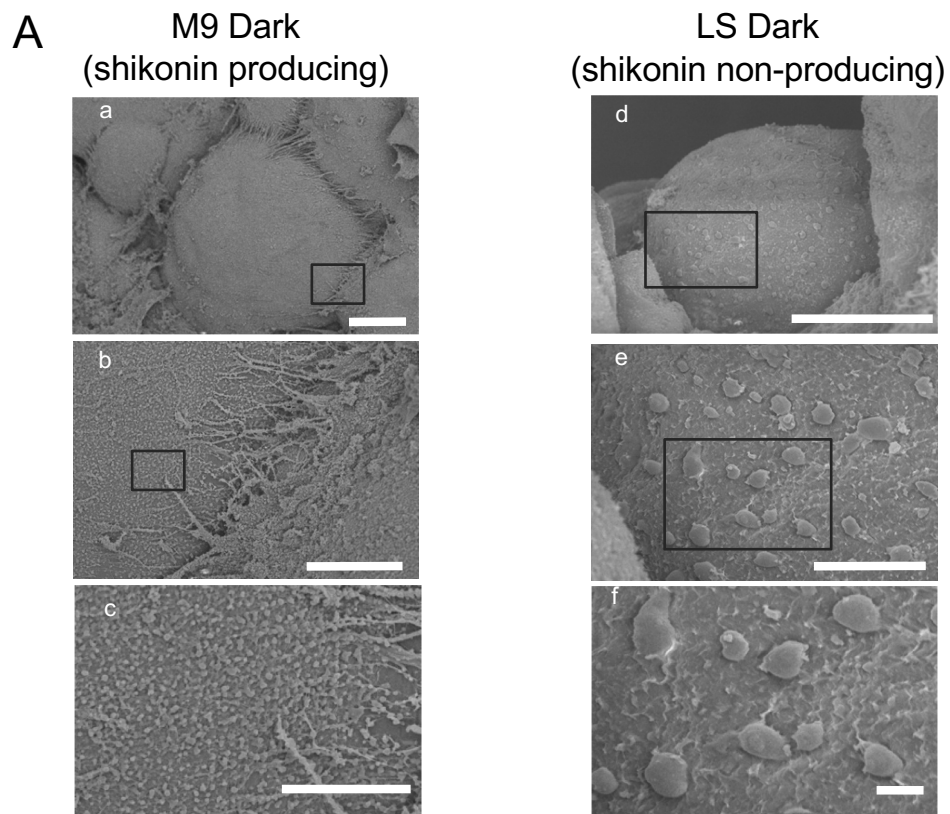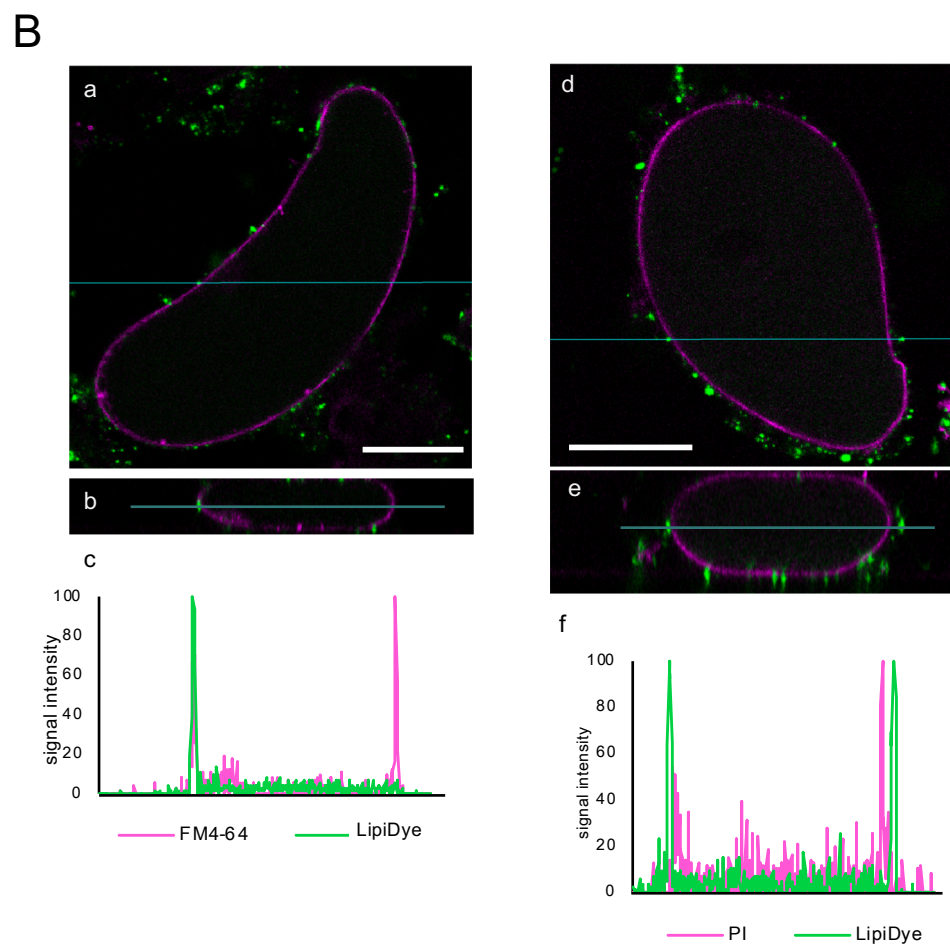

Figure 4

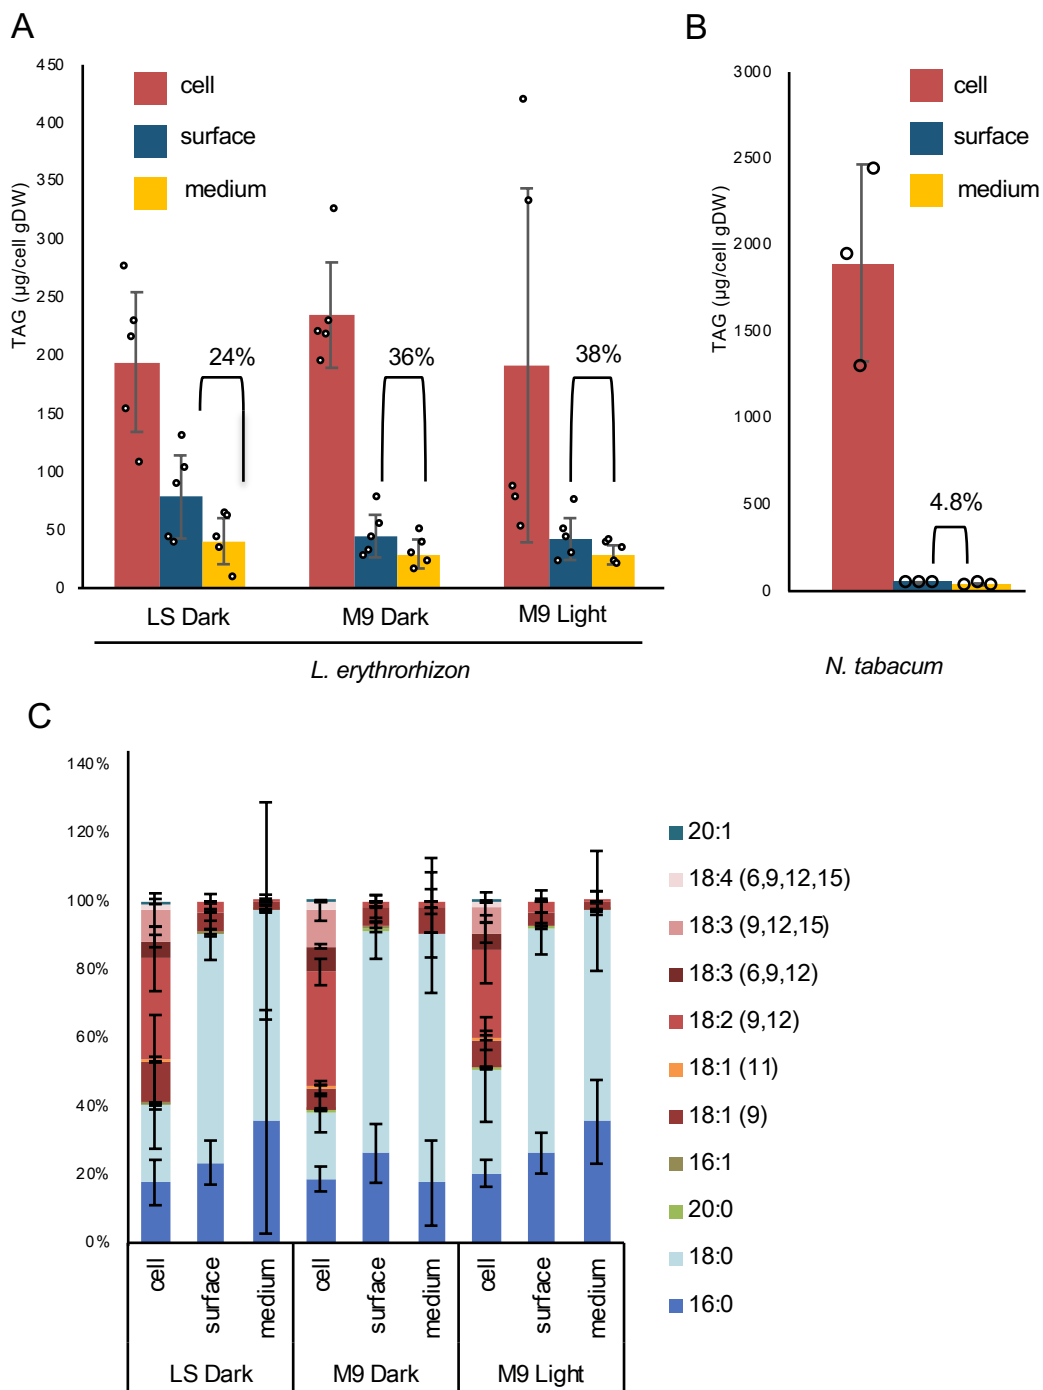

Figure 5

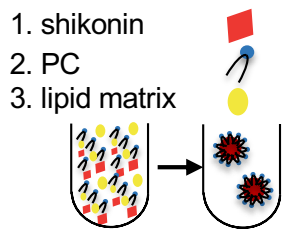

triolein (18:1)×3

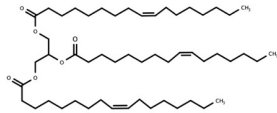

trilinolein (18:2)×3

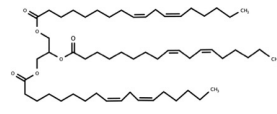

tristearin (18:0)×3

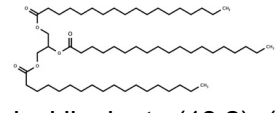

oleyl linoleate (18:2)+(18:1)

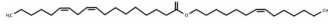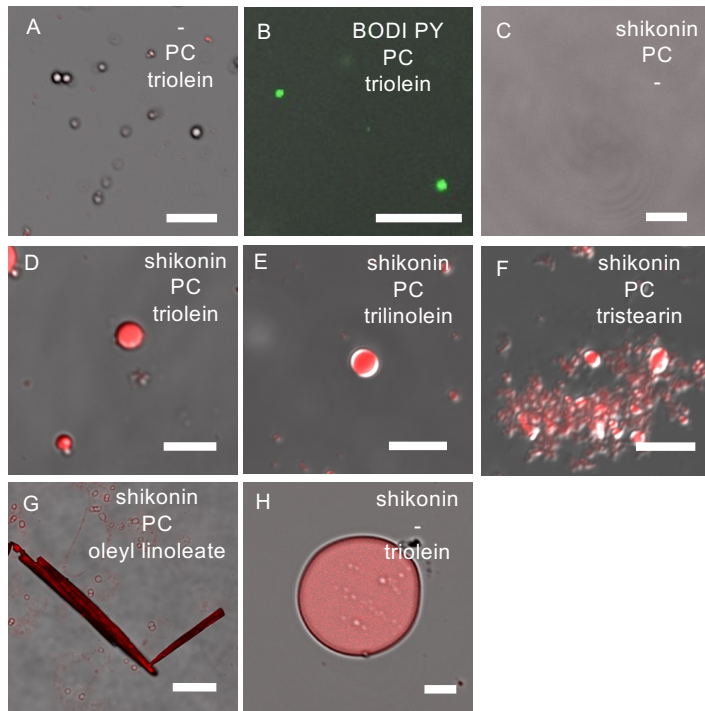

Figure 6
